# Supplementary material
Source: PubMed Central journal article supplement (PMC5548379)
Supplement: NIHMS885354-supplement-supplement_1.pdf [file NIHMS885354-supplement-supplement_1.pdf]

**Supplemental Table 1.** Patient characteristics comparison between CAPOX+Bevacizumab (current study) and CAPOX (prior study Overman *et al.* [4])

| Variable              |           | CAPOX<br>+Bevacizumab (n = 30)       | CAPOX (n = 25)                       | P-value<br>from<br>Fisher<br>exact test |
|-----------------------|-----------|--------------------------------------|--------------------------------------|-----------------------------------------|
| Race                  | Non-white | 8 (26.7%)                            | 5 (20.0%)                            | 0.75                                    |
|                       | White     | 22 (73.3%)                           | 20 (80.0%)                           |                                         |
| Gender                | Male      | 13 (43.3%)                           | 14 (56.0%)                           | 0.42                                    |
|                       | Female    | 17 (56.7%)                           | 11 (44.0%)                           |                                         |
| Ampulla               | No        | 23 (76.7%)                           | 16 (64.0%)                           | 0.23                                    |
|                       | Yes       | 7 (23.3%)                            | 9 (36.0%)                            |                                         |
| Liver metastases      | No        | 13 (43.3%)                           | 13 (52.0%)                           | 0.59                                    |
|                       | Yes       | 17 (56.7%)                           | 12 (48.0%)                           |                                         |
| Peritoneal Metastases | No        | 22 (73.3%)                           | 16 (64.0%)                           | 0.56                                    |
|                       | Yes       | 8 (26.7%)                            | 9 (36.0%)                            |                                         |
| Grade                 | Moderate  | 12 (40.0%)                           | 12 (48.0%)                           | 0.59                                    |
|                       | Poor      | 18 (60.0%)                           | 13 (52.0%)                           |                                         |
| Response              | No        | 15 (51.7%)                           | 12 (48.0%)                           | 0.79                                    |
|                       | Yes       | 14 (48.3%)                           | 13 (52.0%)                           |                                         |
|                       |           | <b>Mean (std), median (min, max)</b> | <b>Mean (std), median (min, max)</b> | <b>Wilcoxon rank sum test</b>           |
| Age (years)           |           | 60.3 (10.8), 63 (33, 78)             | 62.2 (9.0), 63 (41, 79)              | 0.55                                    |

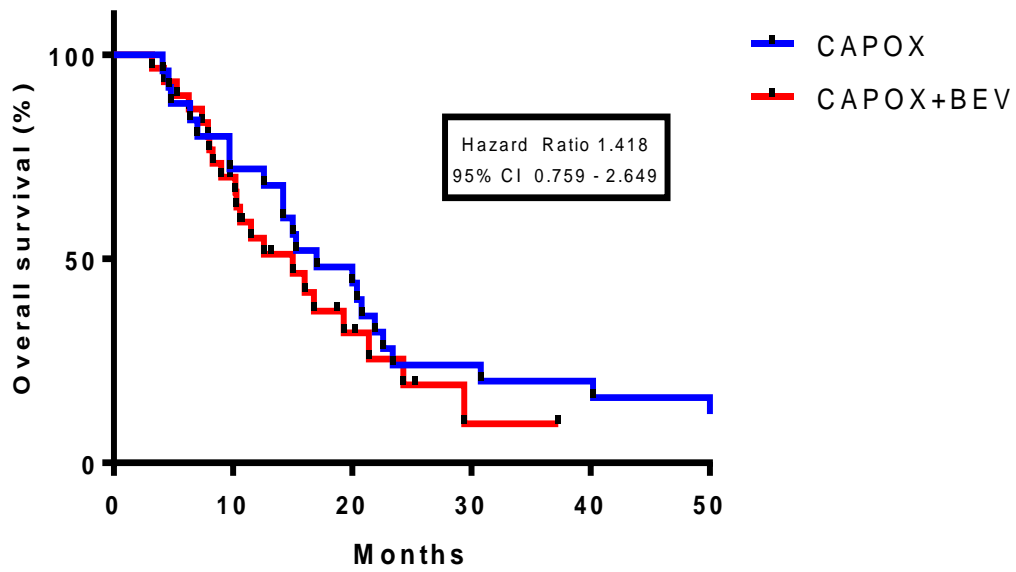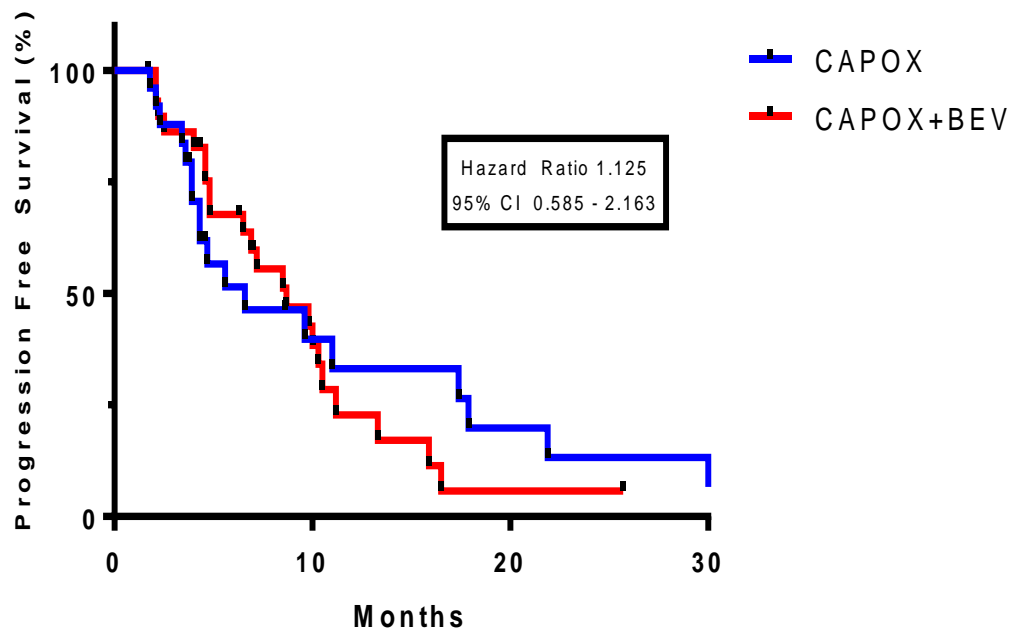

**Supplemental Figure 1.** Kaplan Meier Estimates of overall survival and progression-free survival for CAPOX+Bevacizumab (current study) and CAPOX (prior study Overman *et al.* [4]).
